# Supplementary material for: Highly luminescent and stable quasi-2D perovskite quantum dots by introducing large organic cations
Source: Royal Society of Chemistry journal article supplement (doi:10.1039/d1na00157d), 2021-01-01
Supplement: d1na00157d1.pdf [file d1na00157d1.pdf]

## Electronic Supplementary Information

*Highly Luminescent and Stable Quasi-2D Perovskite Quantum Dots by Introducing Large*

*Organic Cations*

Jingxi Wang, Xiaorui Liu, Lei Zhou, Wei Shen, Ming Li, Rongxing He\*

Key Laboratory of Luminescence Analysis and Molecular Sensing (Southwest University),

Ministry of Education, College of Chemistry and Chemical Engineering, Southwest University,

Chongqing 400715, PR China.

\*Corresponding author

E-mail addresses: herx@swu.edu.cn (R. X. He).

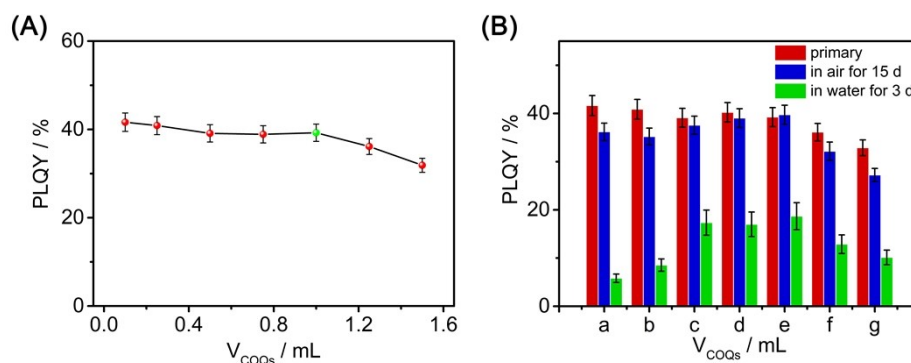

**Figure S1** Optimization of the volume of CQDs-doping. (A) PLQY characterizations and (B) Air and water stability of CQDs-(BA)<sub>2</sub>(MA)<sub>x-1</sub>Pb<sub>x</sub>Br<sub>3x+1</sub> with different CQDs-doping volumes (a~g: 0.1, 0.25, 0.5, 0.75, 1, 1.25 and 1.5 mL).

As shown in Figure S1(A), when the volume of CQDs ranges from 0.1 to 1 mL, the photoluminescence quantum yield (PLQY) of CQDs-(BA)<sub>2</sub>(MA)<sub>x-1</sub>Pb<sub>x</sub>Br<sub>3x+1</sub> has not changed significantly. Then increases the volume of CQDs continuously, the PLQY of perovskite decreases slightly. Therefore, we consider that the volume of CQDs should not exceed 1 mL. Simultaneously, in order to further determine the optimal volume of CQDs, we have characterized the environmental stability of perovskite with different CQDs volumes. As shown in Figure S1(B), the perovskite which doped 1 mL CQDs (column e) shows the best air and water stability. Therefore, the optimal volume of CQDs is 1 mL at last.

**Table S1** The detailed FL lifetimes of the perovskites.

| <b>Materials</b>                  | <b><math>\tau_1/\text{ns}</math></b> | <b><math>f_1/\%</math></b> | <b><math>\tau_2/\text{ns}</math></b> | <b><math>f_2/\%</math></b> | <b><math>\tau_{\text{ave}}/\text{ns}</math></b> |
|-----------------------------------|--------------------------------------|----------------------------|--------------------------------------|----------------------------|-------------------------------------------------|
| MAPbBr <sub>3</sub>               | 6.60                                 | 82                         | 44.77                                | 18                         | 13.46                                           |
| MA:BA = 1:0.5                     | 9.91                                 | 81                         | 50.98                                | 19                         | 17.86                                           |
| MA:BA = 1:1                       | 13.22                                | 85                         | 69.11                                | 15                         | 21.62                                           |
| MA:BA = 1:2                       | 14.92                                | 87                         | 91.27                                | 13                         | 24.58                                           |
| MA:BA = 1:4                       | 1.97                                 | 93                         | 22.39                                | 7                          | 3.40                                            |
| BA <sub>2</sub> PbBr <sub>4</sub> | 2.43                                 | 87                         | 8.71                                 | 13                         | 3.22                                            |

The  $\tau_1$  and  $\tau_2$  relate to the decay time constants of a fast and slow component respectively, while  $f$  corresponds to the proportion of each component, the average lifetime of  $\tau_{\text{ave}}$  is given by the formula:

$$\tau_{\text{ave}} = f_1\tau_1 + f_2\tau_2$$

The fast  $\tau_1$  is mainly due to a non-radiative recombination caused by defects, whereas the slow  $\tau_2$  can be attributed to the radiative recombination.

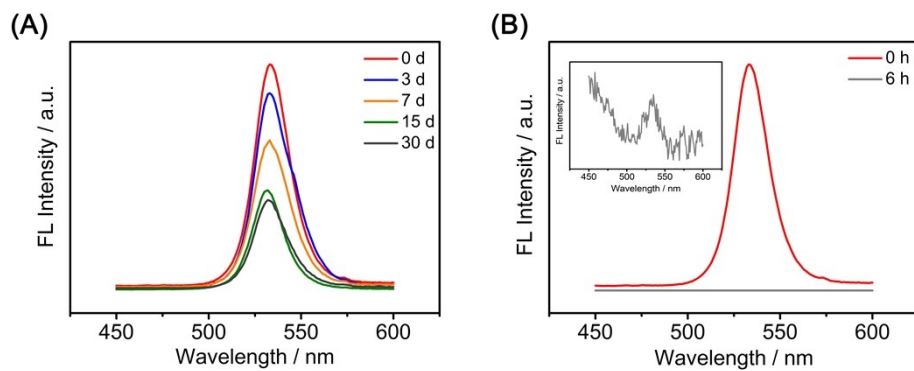

**Figure S2** Stability of MAPbBr<sub>3</sub> in (A) air and (B) water. The illustration is the enlarged FL characterization of MAPbBr<sub>3</sub> in water for 6 h.

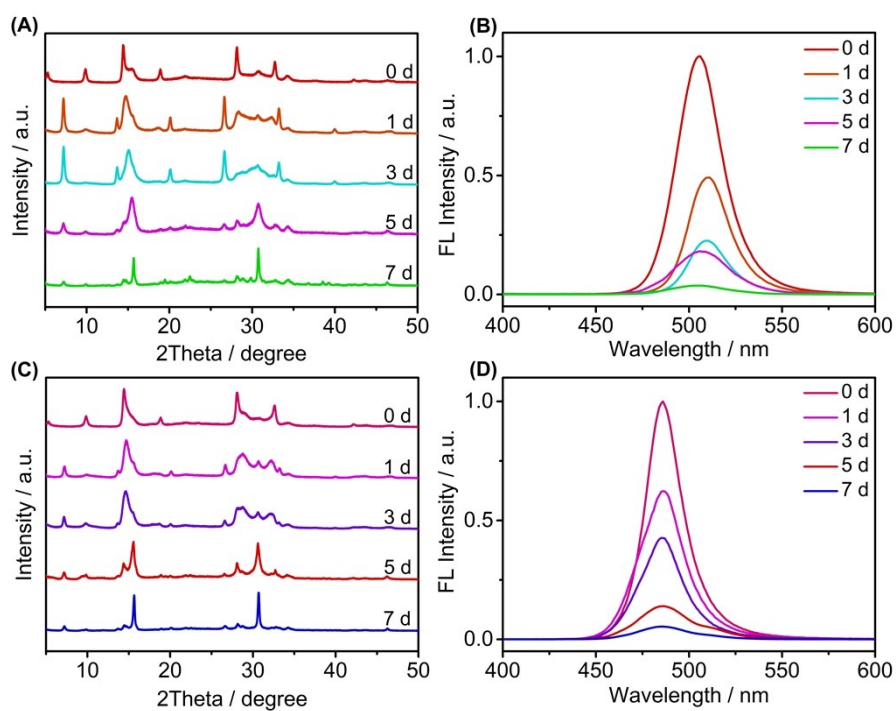

**Figure S3** Stability of quasi-2D perovskites in water. (A) XRD and (B) FL spectra of  $(\text{BA})_2(\text{MA})_{x-1}\text{Pb}_x\text{Br}_{3x+1}(1:1)$ , (C) XRD and (D) FL spectra of CQDs- $(\text{BA})_2(\text{MA})_{x-1}\text{Pb}_x\text{Br}_{3x+1}(1:1)$  stores in water for 7 days.

**Table S2** A summary of different quasi-2D PQDs.

| Quasi-2D Material                                                                      | PLQY        | Stability                                 | Application            | Ref.             |
|----------------------------------------------------------------------------------------|-------------|-------------------------------------------|------------------------|------------------|
| BA <sub>2</sub> DMA <sub>1.6</sub> Cs <sub>2</sub> Pb <sub>3</sub> Br <sub>11.6</sub>  | 52.8%       | null                                      | PeLED                  | [1]              |
| PEA <sub>2</sub> DMA <sub>1.2</sub> Cs <sub>2</sub> Pb <sub>3</sub> Br <sub>11.2</sub> | 63.2%       |                                           |                        |                  |
| PEA inserted CsPbBr <sub>3</sub>                                                       | 10.0% (EQE) | null                                      | PeLED                  | [2]              |
| Polymer capped PEA-MAPbBr <sub>3</sub>                                                 | 65%         | 50 d in air and water                     | color-conversion films | [3]              |
| BA doped FAPbBr <sub>3</sub>                                                           | 16%         | null                                      | PeLED                  | [4]              |
| CQDs-(BA) <sub>2</sub> (MA) <sub>x-1</sub> Pb <sub>x</sub> Br <sub>3x+1</sub>          | 39.3%       | more than 30 d in air<br>and 3 d in water | FL assay               | <i>This work</i> |

**References:**

- [1] Zeng, S. Y.; Shi, S. S.; Wang, S. R.; Xiao, Y. Mixed-ligand engineering of quasi-2D perovskites for efficient sky-blue light-emitting diodes. *J. Mater. Chem. C* **2020**, *8*, 1319.
- [2] Guan, Z. Q.; Shen, D.; Li, M. L.; Ma, C. Q.; Chen, W. C.; Cui, X.; Liu, B.; Lo, M. F.; Tsang, S. W.; Lee, C. S.; Zhang, W. J. Effects of Hydrogen Bonds between Polymeric Hole-Transporting Material and Organic Cation Spacer on Morphology of Quasi-Two Dimensional Perovskite Grains and Their Performance in Light Emitting Diodes. *ACS Appl. Mater. Interfaces* **2020**, *12*, 9440-9447.
- [3] Jia, S. Q.; Li, G. Y.; Liu, P.; Cai, R.; Tang, H. D.; Xu, B.; Wang, Z. J.; Wu, Z. H.; Wang, K.; Sun, X. W. Highly Luminescent and Stable Green Quasi-2D Perovskite-Embedded Polymer Sheets by Inkjet Printing. *Adv. Funct. Mater.* **2020**, *30*, 1910817.
- [4] Alehdaghi, H.; Kanwat, A.; Zirak, M.; Moyen, E.; Choi, W. C.; Jang, J. Quasi-2D organic cation-doped formamidinium lead bromide (FAPbBr<sub>3</sub>) perovskite light-emitting diodes by long alkyl chain. *Org. Electron.* **2020**, *79*, 105626.

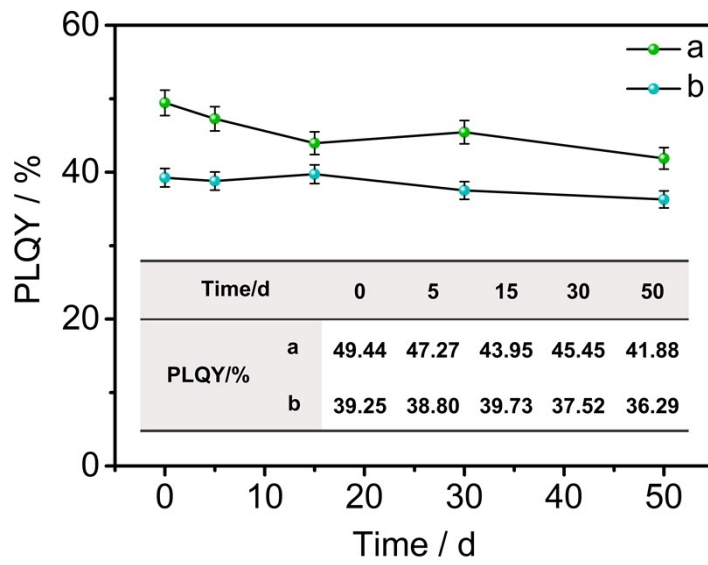

**Figure S4** PLQY characterizations of (a)  $(\text{BA})_2(\text{MA})_{x-1}\text{Pb}_x\text{Br}_{3x+1}(1:1)$  and (b)  $\text{CQDs}-(\text{BA})_2(\text{MA})_x-$

$\text{Pb}_x\text{Br}_{3x+1}(1:1)$  in air for 50 days.

Under the optimized conditions in Figure S5, the detecting process of  $\text{H}_2\text{O}_2$  is described as follows. Firstly, 213  $\mu\text{L}$  of the prepared  $\text{CQDs}-(\text{BA})_2(\text{MA})_{x-1}\text{Pb}_x\text{Br}_{3x+1}(1:1)$  is dispersed in 2 mL of toluene to form a long-term stable colloidal solution, the concentration of  $\text{Br}^-$  in this solution is about 4 mM. Then, 10  $\mu\text{L}$  of  $\text{H}_2\text{O}_2$  with different concentrations were added in 100  $\mu\text{L}$  ethyl acetate with 80 mM  $\text{I}^-$ , respectively. After 5 min redox reaction, the above mixture is added into 2 mL  $\text{CQDs}-(\text{BA})_2(\text{MA})_{x-1}\text{Pb}_x\text{Br}_{3x+1}(1:1)$  solution. Here, the concentration of  $\text{H}_2\text{O}_2$  in redox reaction determines the amount of residual  $\text{I}^-$ , and the remaining  $\text{I}^-$  changes the emission wavelength of  $\text{CQDs}-(\text{BA})_2(\text{MA})_{x-1}\text{Pb}_x\text{Br}_{3x+1}(1:1)$  via halide exchange. In combination with the above processes, the semi-quantitative colorimetric detection of  $\text{H}_2\text{O}_2$  can be realized by monitoring the change of perovskite fluorescence wavelength.

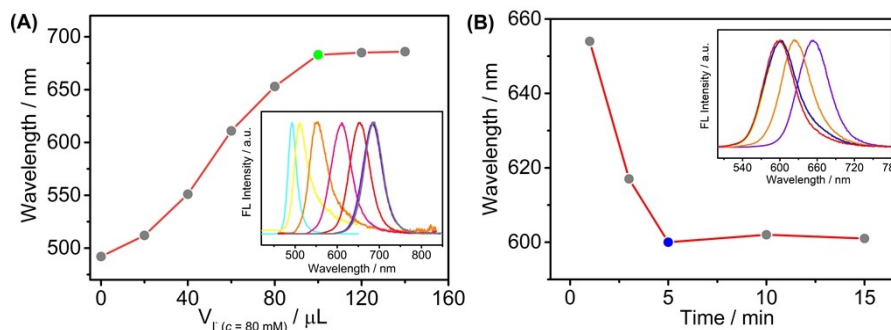

**Figure S5** (A) Optimization of the volume of  $\text{I}^-$  (80 mM) in 2 mL  $\text{CQDs}-(\text{BA})_2(\text{MA})_{x-1}\text{Pb}_x\text{Br}_{3x+1}(1:1)$  solution; (B) Optimization of reaction time between  $\text{I}^-$  (100  $\mu\text{L}$ , 80 mM) and  $\text{H}_2\text{O}_2$  (10  $\mu\text{L}$ , 1 mM) in 2 mL  $\text{CQDs}-(\text{BA})_2(\text{MA})_{x-1}\text{Pb}_x\text{Br}_{3x+1}(1:1)$  solution.
